# Supplementary material for: 3D porous micro/nanostructured interconnected metal/metal oxide electrodes for high-rate lithium storage
Source: Royal Society of Chemistry journal article supplement (doi:10.1039/c2ra21733c), 2012-11-05
Supplement: c2ra21733c.pdf [file c2ra21733c.pdf]

## *Electronic Supplementary Information for*

# **3D porous micro/nanostructured interconnected metal/metal oxide electrodes for high-rate lithium storage**

**Xin Chen,<sup>a</sup> Kening Sun,<sup>\*,b,c</sup> Enshuang Zhang,<sup>a</sup> and Naiqing Zhang<sup>\*,b,c</sup>**

<sup>a</sup>Department of Chemistry, Harbin Institute of Technology, Harbin, 150001, PR China.

<sup>b</sup>Academy of Fundamental and Interdisciplinary Sciences, Harbin Institute of Technology, Harbin, 150001, PR China. Fax: +86 451 86412153; Tel: +86 451 86412153.

<sup>c</sup>State Key Laboratory of Urban Water Resource and Environment, Harbin Institute of Technology, Harbin, 150090, PR China.

E-mail: [keningsun@yahoo.com.cn](mailto:keningsun@yahoo.com.cn).

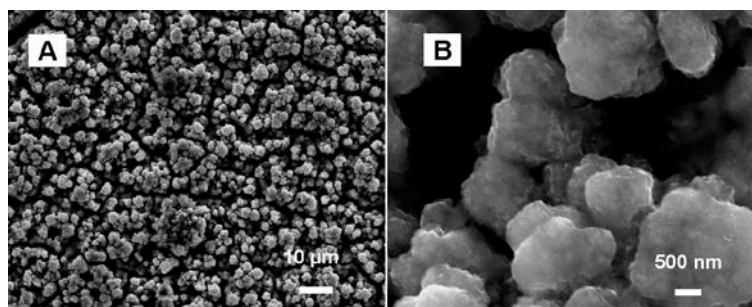

Fig. S1 (A-B) SEM images of 3D PMNI Ni/NiO after 100 cycles at 1C (718 mA·g<sup>-1</sup>) rate.

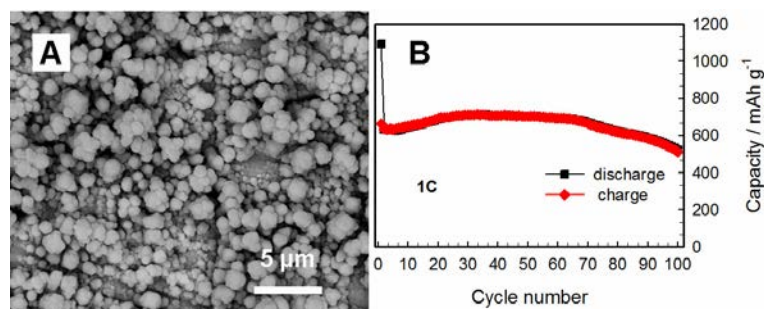

Fig. S2 (A) SEM image and (B) cycling performance of Ni/NiO obtained by heating porous Ni (under the current density of 2A·cm<sup>-2</sup> for 20 s in 0.02 M NiCl<sub>2</sub> and 1.0 M NH<sub>4</sub>Cl solutions) at 450°C for 2 h.

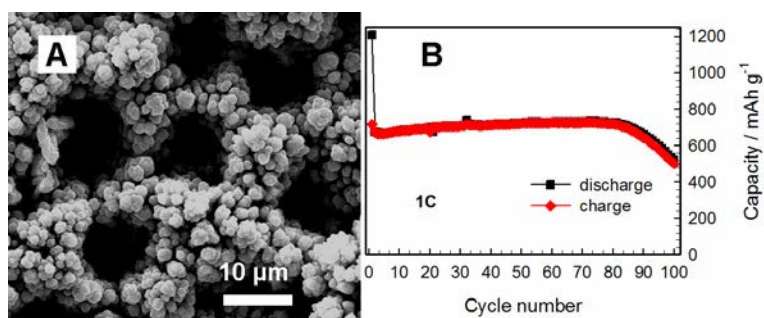

Fig. S3 (A) SEM image and (B) cycling performance of 3D Ni/NiO obtained by heating porous Ni (under the current density of  $4\text{A}\cdot\text{cm}^{-2}$  for 20 s in 0.05 M  $\text{NiCl}_2$  and 1.0 M  $\text{NH}_4\text{Cl}$  solutions) at  $450^\circ\text{C}$  for 2 h.

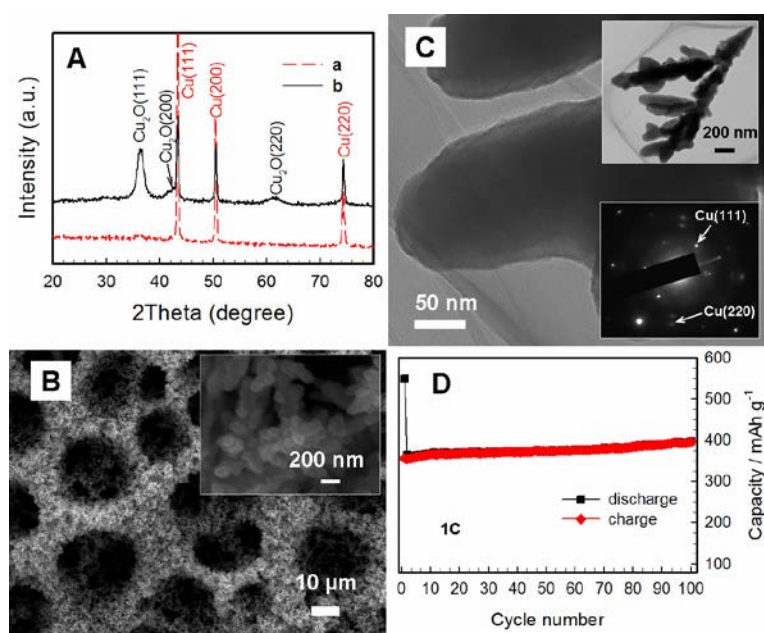

Fig. S4 (A) XRD pattern, (B) SEM and (C) TEM images of 3D porous Cu, and (D) cycling performance of 3D PMNI Cu/ $\text{Cu}_2\text{O}$  at 1C ( $375\text{mA}\cdot\text{g}^{-1}$ ) rate.

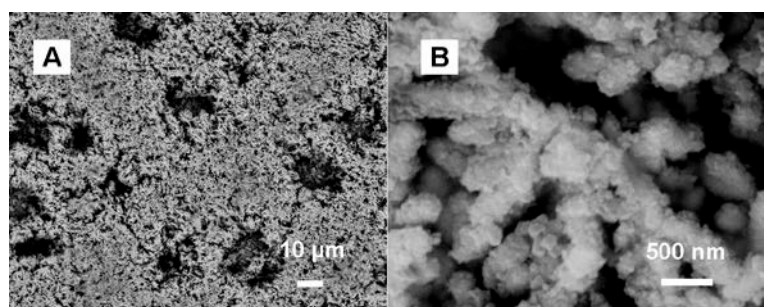

Fig. S5 (A-B) SEM images of 3D PMNI Cu/ $\text{Cu}_2\text{O}$  after 100 cycles at 1C rate.
